# Supplementary material for: From Fathers to Fathers—Telephone-Based Peer Support: A Feasibility Study
Source: MDPI journal article supplement (doi:10.3390/socsci13030155), 2024-03-07
Supplement: s1 [file s1]

Archive with 1 entries (1 files):
- socsci-2844304-supplementary.pdf
