# Supplementary material for: From Fathers to Fathers—Telephone-Based Peer Support: A Feasibility Study
Source: MDPI journal article supplement (doi:10.3390/socsci13030155), 2024-03-07
Supplement: s1 [file s1 › socsci-2844304-supplementary.pdf]

## **File S1. Interview guide**

### **Peer**

Feel free to tell us how you thought when you signed up to be a father supporter

How did you experience making the first contact

How did you contact each other for the first time and other contacts

How often did you talk to dads? And do you think that was enough to give him support?

Should you continue to talk to the fathers even after the project is over

Do you think the length of the support is sufficient (calls should be more or less the number of weeks before it is "ready")?

How did you experience the support talking

What parts did you focus on in the conversations?

How did it feel to be a listener?

Were there any difficulties in the conversations?

How do you think the father experienced the conversations?

Did he want something you could not give?  
Did he expressed that the conversations helped him in the role of father?  
Did he express something else

What could be done better in the conversations?

Do you have any suggestions on how we (research team) can improve the conditions for the conversations?

Other suggestion for the peer support?

### **Father**

What do you expect when you sign up for Peer Support?

How did it feel to not to see the person?

Write what happened when you first had contact with your peer supporters.

How often did you talk to your peer supporter?  
Do you think you got all the support you needed?

Have you settled it before, the length of the meeting?

Do you think the length of the support is sufficient? why or why not?

- Is the number of calls per week appropriate?

- Is the total numbers of calls appropriate?

Do you want to continue talking with peer supporters, even after the project has ended? why or why not?

Write your experiences of receiving support.

- Which part was most of focus in the conversations? (informative, supportive/confirming, feedback)

- How did it feel to receive support?

- Were there any difficulties in the talks?

How do you think the peer supporter felt about the conversations?

-What can be done better in the conversations?

Do you have any suggestions on how we (the research team) can improve the conditions for the peer support program?

Another suggestion for the peer support program?
